# Supplementary material for: Intestinal microbiota changes induced by TNF-inhibitors in IBD-related spondyloarthritis
Source: HighWire-hosted journal article supplement (doi:10.1136/rmdopen-2021-001755), 2021-09-01

**Determination of the Alpha Diversity at the Phylum level using the Simpson index:**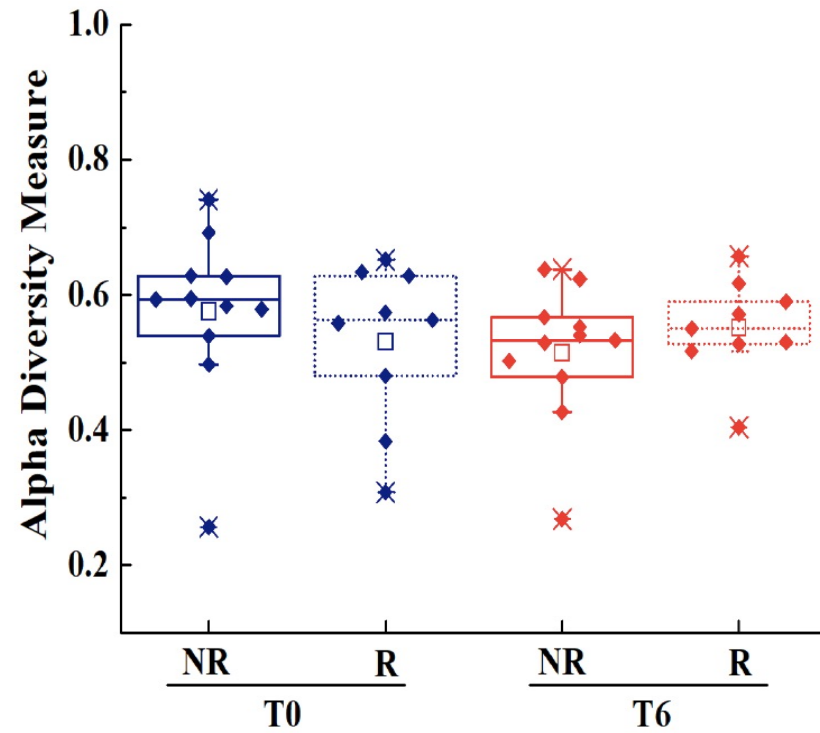**Determination of the Alpha Diversity at the Class level using the Simpson index:**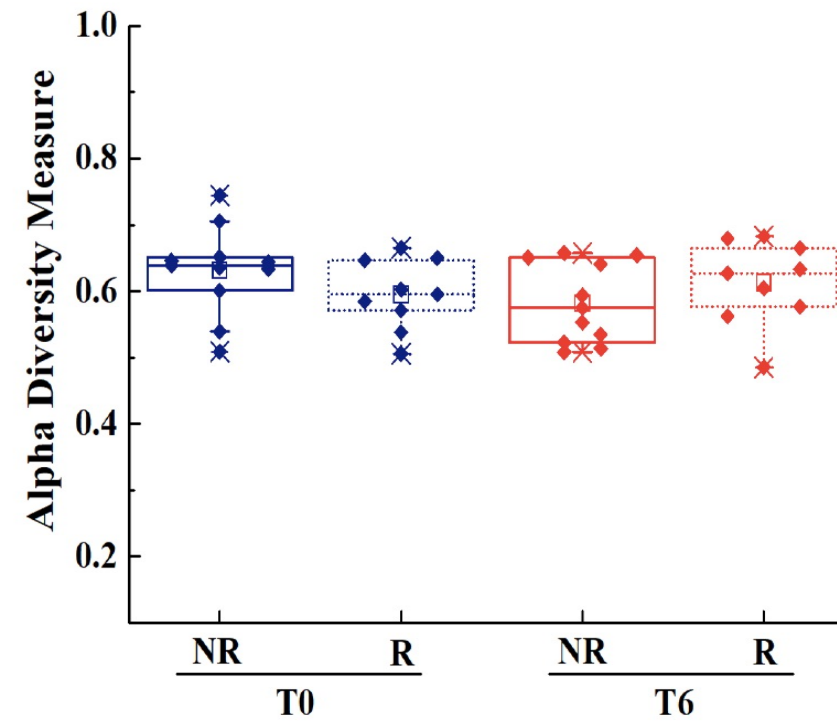

**Determination of the Alpha Diversity at the Order level using the Simpson index:**

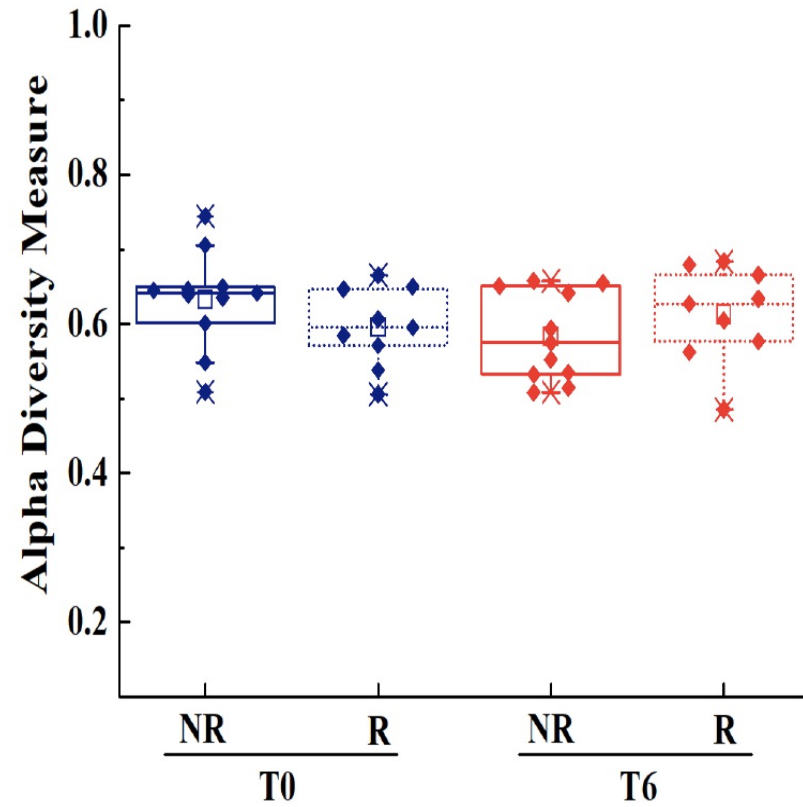

**Determination of the Alpha Diversity at the Family level using the Simpson index:**

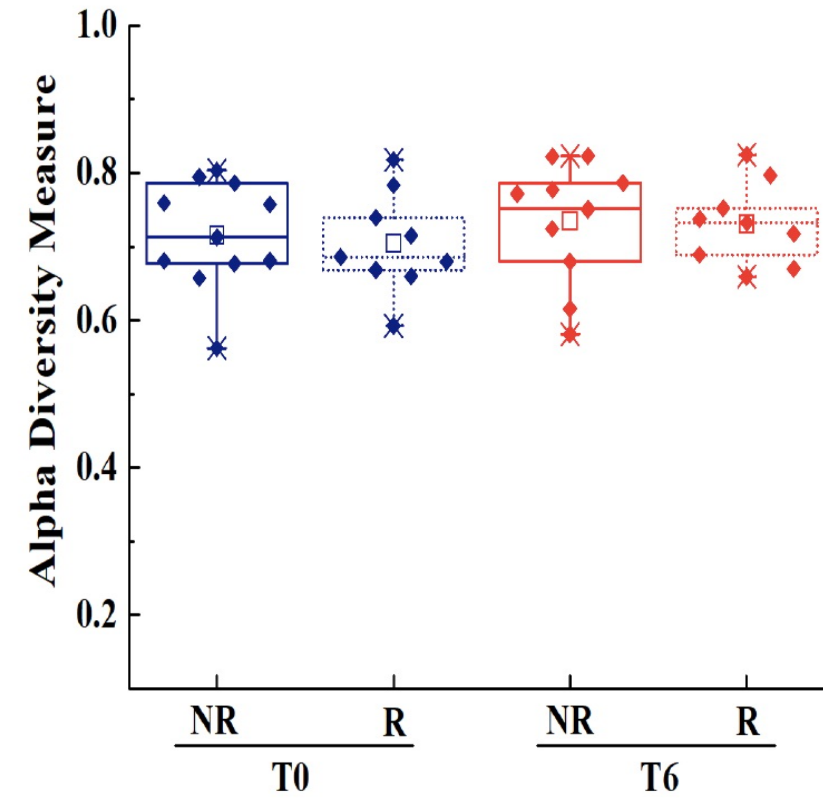

**Determination of the Alpha Diversity at the Genus level using the Simpson index:**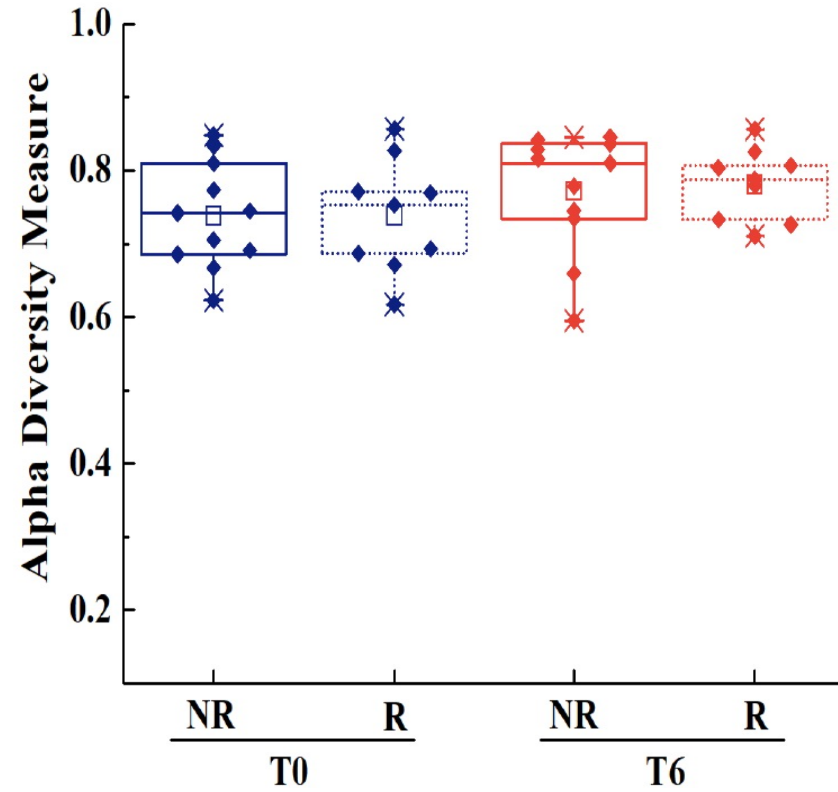**Determination of the Alpha Diversity at the Species level using the Simpson index:**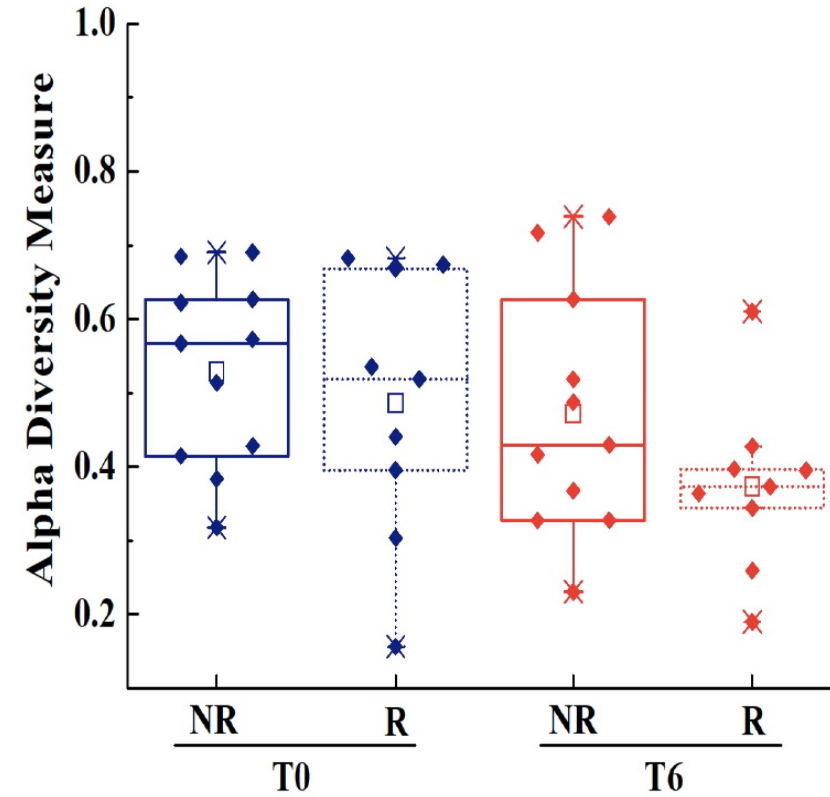

Supplement: rmdopen-2021-001755supp008_data_supplement.pdf [file rmdopen-2021-001755supp008_data_supplement.pdf]
