# Supplementary figures and images for: Intestinal microbiota changes induced by TNF-inhibitors in IBD-related spondyloarthritis
Source: HighWire-hosted journal article supplement (doi:10.1136/rmdopen-2021-001755), 2021-09-01

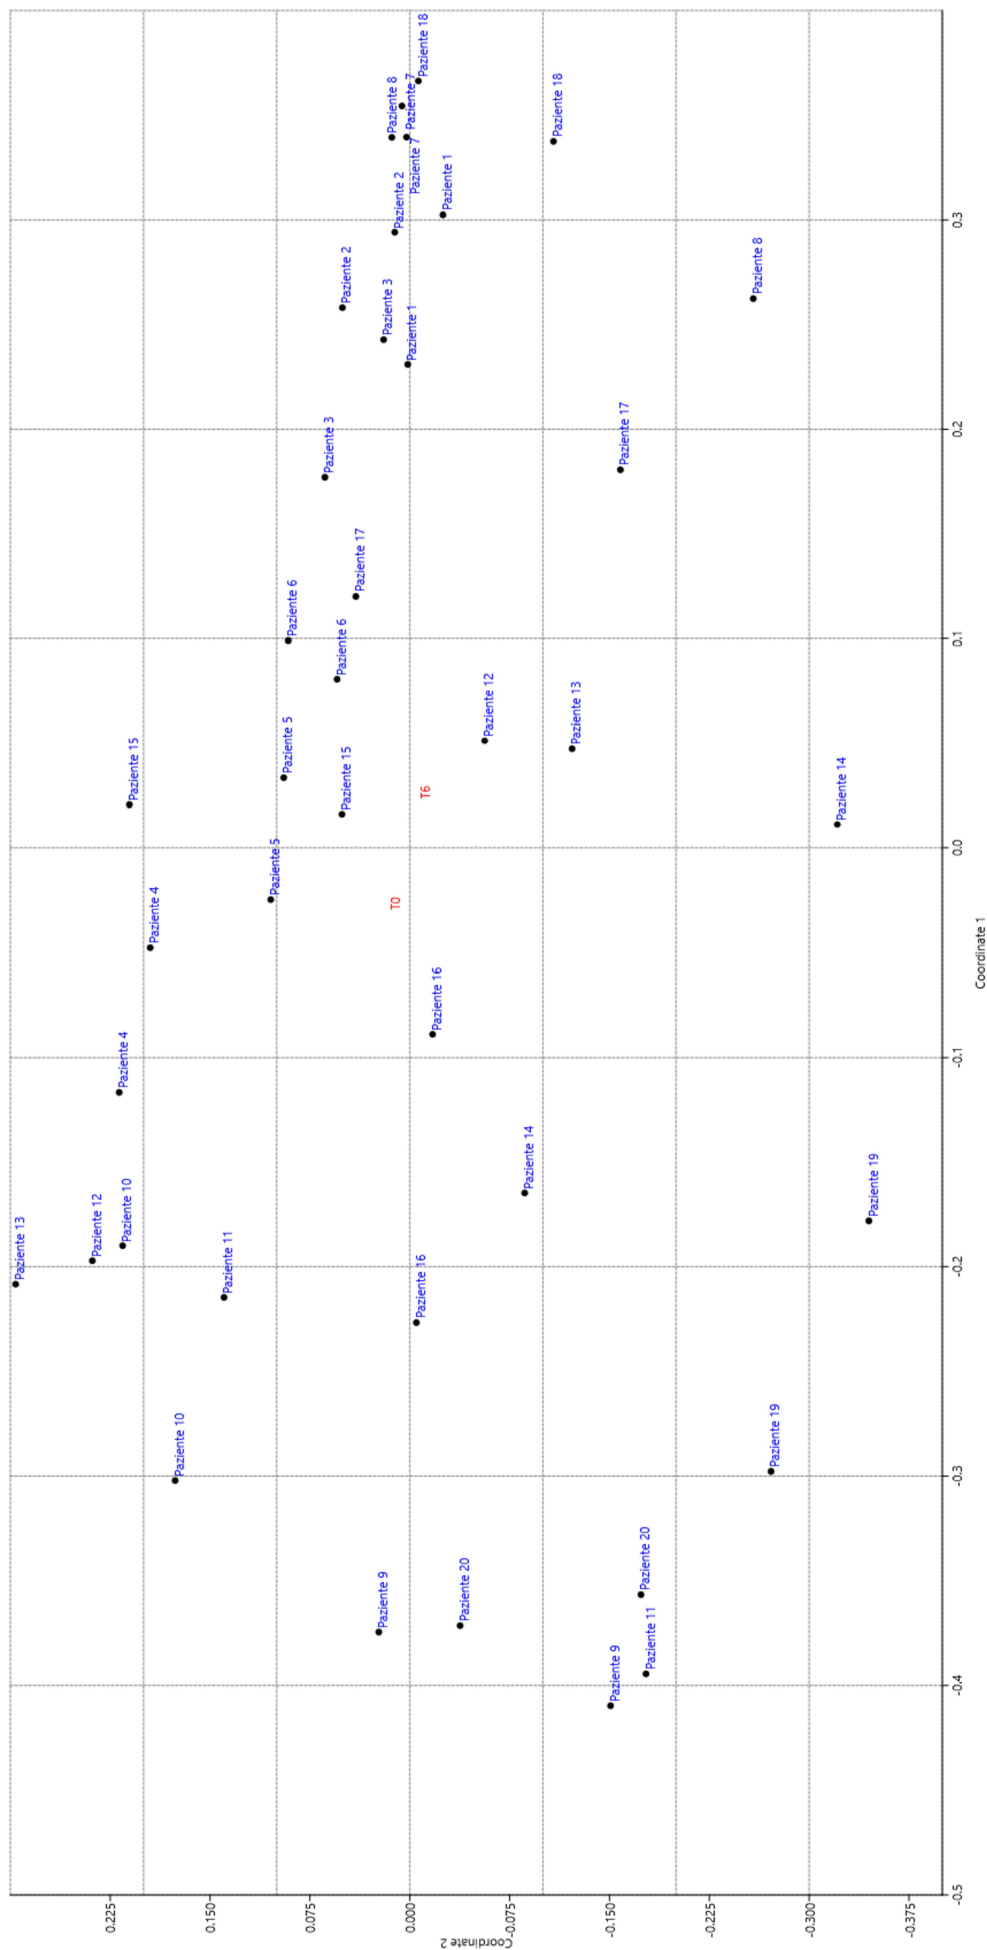

Supplement: rmdopen-2021-001755supp001_data_supplement.pdf [file rmdopen-2021-001755supp001_data_supplement.pdf]

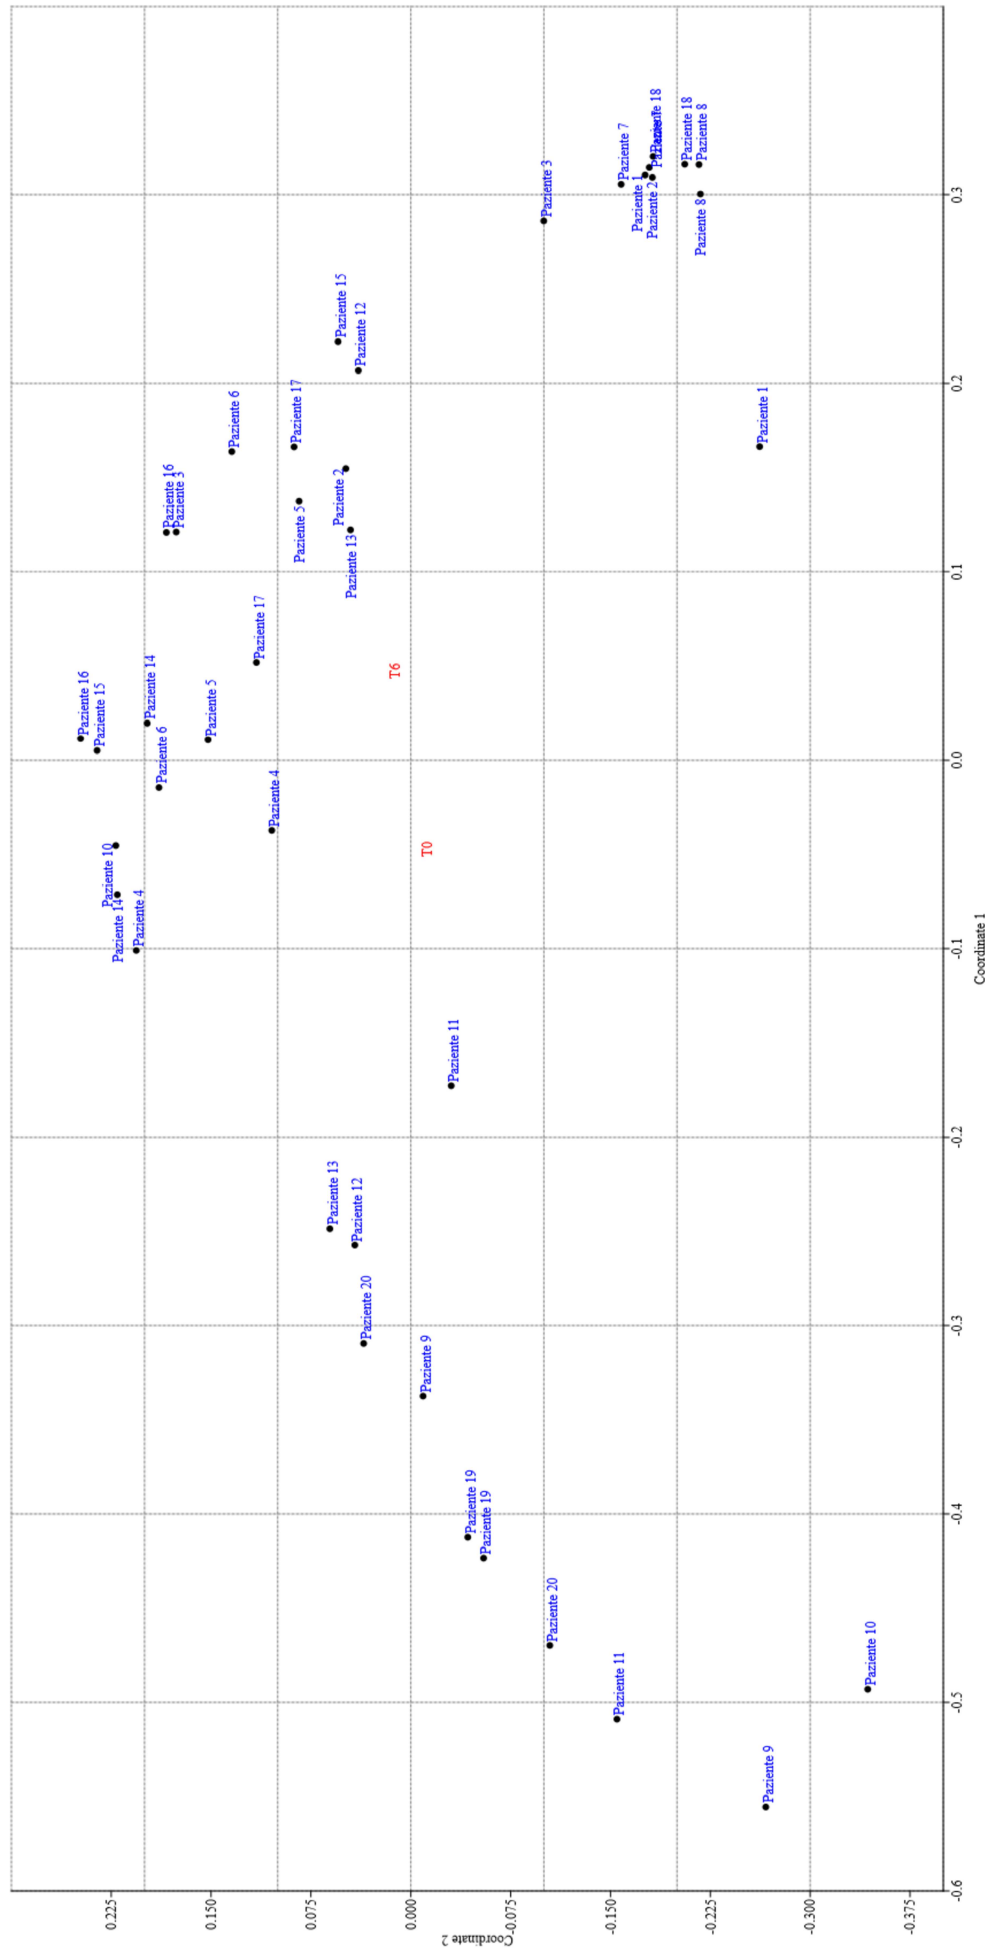

Supplement: rmdopen-2021-001755supp006_data_supplement.pdf [file rmdopen-2021-001755supp006_data_supplement.pdf]
